# Supplementary material
Source: PubMed Central journal article supplement (PMC1578623)
Supplement: JCI0628310sd.pdf [file JCI0628310sd.pdf]

Supplementary Table 1. Limiting dilution data for CRU frequency determinations for day 18.5

FL and BM cells (data pooled from 5 experiments).

| FL                                                   |                                                 | BM                                                   |                                                 |
|------------------------------------------------------|-------------------------------------------------|------------------------------------------------------|-------------------------------------------------|
| No. of cells injected<br>per mouse ( $\times 10^3$ ) | No. of negative mice<br>per total mice injected | No. of cells injected<br>per mouse ( $\times 10^2$ ) | No. of negative mice<br>per total mice injected |
| 2800                                                 | 1 / 9                                           | 4725                                                 | 0 / 4                                           |
| 250                                                  | 0 / 6                                           | 2800                                                 | 1 / 9                                           |
| 80                                                   | 5 / 20                                          | 2500                                                 | 0 / 3                                           |
| 20                                                   | 11 / 14                                         | 1575                                                 | 1 / 4                                           |
|                                                      |                                                 | 800                                                  | 6 / 12                                          |
|                                                      |                                                 | 200                                                  | 9 / 15                                          |
| CRU frequency<br>(range defined by $\pm$ SEM)        | 1 / 73,000<br>+ 1 / 59,000<br>-1 / 91,000       | CRU frequency<br>(range defined by $\pm$ SEM)        | 1 / 95,000<br>+ 1 / 75,400<br>- 1 / 119,000     |

Supplementary Table 2. Limiting dilution data for CRU frequency determinations for  $\text{lin}^-$  BM cells from 3 and 4 week-old mice (pooled data from 2 experiments).

| 3-week BM                                            |                                                 | 4-week BM                                            |                                                 |
|------------------------------------------------------|-------------------------------------------------|------------------------------------------------------|-------------------------------------------------|
| No. of cells injected<br>per mouse ( $\times 10^3$ ) | No. of negative mice<br>per total mice injected | No. of cells injected<br>per mouse ( $\times 10^3$ ) | No. of negative mice<br>per total mice injected |
| 12                                                   | 0 / 3                                           | 11                                                   | 0 / 3                                           |
| 4                                                    | 4 / 6                                           | 4                                                    | 4 / 6                                           |
| CRU frequency<br>(range defined by $\pm$ SEM)        | 1 / 6,500<br>+ 1 / 4,000<br>- 1 / 10,000        | CRU frequency<br>(range defined by $\pm$ SEM)        | 1 / 6,300<br>+ 1 / 4,000<br>- 1 / 10,000        |
